# Supplementary figures and images for: MASTER KEY Project: Powering Clinical Development for Rare Cancers Through a Platform Trial
Source: PubMed Central journal article supplement — Clin Pharmacol Ther. 2020 Apr 7;108(3):596–605. doi: 10.1002/cpt.1817 (PMC7484913; doi:10.1002/cpt.1817), 2020-04-07

**Figure S2 . Tumor mutation burden according to tumor type**

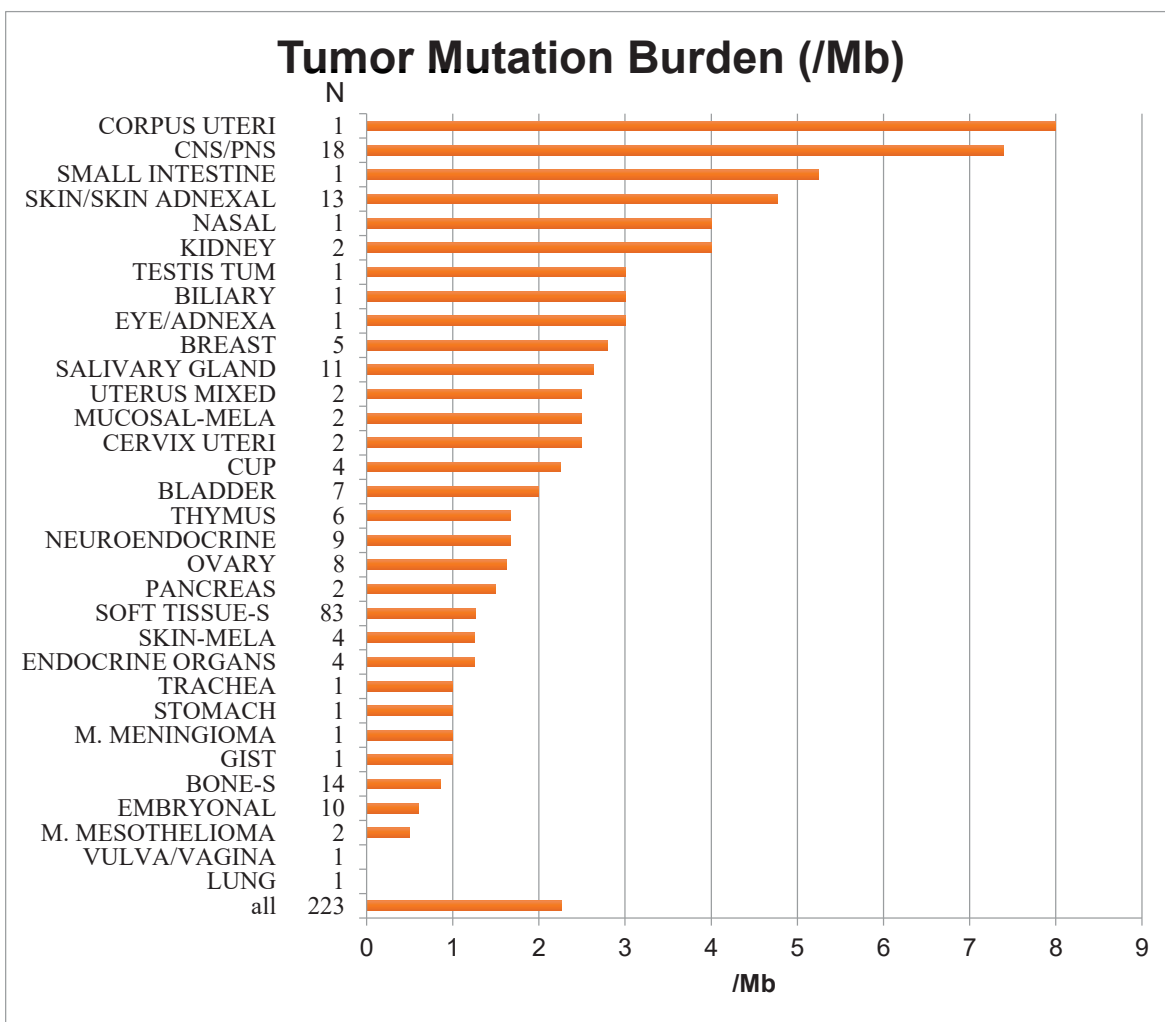

Supplement: CPT-108-596-s002.pdf [file CPT-108-596-s002.pdf]
